# Supplementary material for: Study of the Influence of the Excipients Used for the Synthesis of Microspheres Loaded with Quercetin: Their Characterization and Antimicrobial Activity
Source: MDPI journal article supplement (doi:10.3390/coatings13081376), 2023-08-05
Supplement: s1 [file s1]

## Supplementary material

**Table S1.** Results of the non-linear regression of the idxSWL (%) time series for sample P1 and all pH factor levels.

| idxSWL(%) P1                             | pH 1.2           | pH 3               | pH 5              | pH 6.8           | pH 7.4           |
|------------------------------------------|------------------|--------------------|-------------------|------------------|------------------|
| <b>One phase exponential association</b> |                  |                    |                   |                  |                  |
| <b>Best-fit values</b>                   |                  |                    |                   |                  |                  |
| Ymax                                     | 1540             | 6264               | 13478             | 12299            | 14833            |
| K                                        | 0.2327           | 0.06906            | 0.08771           | 0.2324           | 0.299            |
| Half Life                                | 2.979            | 10.04              | 7.902             | 2.982            | 2.318            |
| <b>Std. Error</b>                        |                  |                    |                   |                  |                  |
| Ymax                                     | 37.94            | 868.7              | 2158              | 333.4            | 213.7            |
| K                                        | 0.01138          | 0.0119             | 0.01848           | 0.0125           | 0.01003          |
| <b>95% Confidence Intervals</b>          |                  |                    |                   |                  |                  |
| Ymax                                     | 1461 to 1618     | 4462 to 8066       | 9002 to 17953     | 11607 to 12990   | 14390 to 15276   |
| K                                        | 0.2091 to 0.2563 | 0.04438 to 0.09375 | 0.04938 to 0.1260 | 0.2065 to 0.2583 | 0.2782 to 0.3198 |
| Half Life                                | 2.704 to 3.315   | 7.393 to 15.62     | 5.499 to 14.04    | 2.683 to 3.356   | 2.168 to 2.492   |
| <b>Goodness of Fit</b>                   |                  |                    |                   |                  |                  |
| Degrees of Freedom                       | 22               | 22                 | 22                | 22               | 22               |
| R square                                 | 0.9922           | 0.9907             | 0.9793            | 0.9907           | 0.9941           |
| Adjusted R square                        | 0.9918           | 0.9902             | 0.9784            | 0.9903           | 0.9939           |

**Table S2.** Results of the non-linear regression of the idxSWL (%) time series for sample P2 and all pH factor levels.

| idxSWL(%) P2                             | pH 1.2           | pH 3               | pH 5              | pH 6.8           | pH 7.4           |
|------------------------------------------|------------------|--------------------|-------------------|------------------|------------------|
| <b>One phase exponential association</b> |                  |                    |                   |                  |                  |
| <b>Best-fit values</b>                   |                  |                    |                   |                  |                  |
| Ymax                                     | 1541             | 6085               | 13374             | 12295            | 14835            |
| K                                        | 0.2372           | 0.0721             | 0.08886           | 0.2332           | 0.2996           |
| Half Life                                | 2.922            | 9.613              | 7.801             | 2.972            | 2.313            |
| <b>Std. Error</b>                        |                  |                    |                   |                  |                  |
| Ymax                                     | 36.97            | 784                | 2089              | 329.6            | 212.3            |
| K                                        | 0.01143          | 0.01165            | 0.01833           | 0.01243          | 0.009994         |
| <b>95% Confidence Intervals</b>          |                  |                    |                   |                  |                  |
| Ymax                                     | 1464 to 1617     | 4459 to 7711       | 9042 to 17706     | 11611 to 12979   | 14395 to 15275   |
| K                                        | 0.2135 to 0.2609 | 0.04794 to 0.09627 | 0.05084 to 0.1269 | 0.2074 to 0.2590 | 0.2789 to 0.3203 |
| Half Life                                | 2.657 to 3.247   | 7.200 to 14.46     | 5.463 to 13.63    | 2.677 to 3.342   | 2.164 to 2.485   |
| <b>Goodness of Fit</b>                   |                  |                    |                   |                  |                  |
| Degrees of Freedom                       | 22               | 22                 | 22                | 22               | 22               |
| R square                                 | 0.9921           | 0.991              | 0.9796            | 0.9908           | 0.9942           |
| Adjusted R square                        | 0.9918           | 0.9906             | 0.9787            | 0.9904           | 0.9939           |

**Table S3.** Results of the non-linear regression of the idxSWL (%) time series for sample P3 and all pH factor levels.

| idxSWL(%) P3 | pH 1.2 | pH 3 | pH 5 | pH 6.8 | pH 7.4 |
|--------------|--------|------|------|--------|--------|
|--------------|--------|------|------|--------|--------|

| One phase exponential association |                           |                  |                    |                   |                  |                  |
|-----------------------------------|---------------------------|------------------|--------------------|-------------------|------------------|------------------|
| <b>Best-fit values</b>            |                           |                  |                    |                   |                  |                  |
|                                   | <b>Ymax</b>               | 1539             | 5848               | 13223             | 12284            | 14833            |
|                                   | <b>K</b>                  | 0.2435           | 0.07641            | 0.09049           | 0.2343           | 0.3006           |
|                                   | <b>Half Life</b>          | 2.847            | 9.071              | 7.66              | 2.958            | 2.306            |
| <b>Std. Error</b>                 |                           |                  |                    |                   |                  |                  |
|                                   | <b>Ymax</b>               | 36.82            | 675.6              | 1996              | 324.2            | 210.4            |
|                                   | <b>K</b>                  | 0.01188          | 0.01122            | 0.01813           | 0.01233          | 0.009961         |
| <b>95% Confidence Intervals</b>   |                           |                  |                    |                   |                  |                  |
|                                   | <b>Ymax</b>               | 1462 to 1615     | 4446 to 7249       | 9084 to 17363     | 11611 to 12956   | 14396 to 15269   |
|                                   | <b>K</b>                  | 0.2188 to 0.2681 | 0.05313 to 0.09969 | 0.05289 to 0.1281 | 0.2088 to 0.2599 | 0.2799 to 0.3212 |
|                                   | <b>Half Life</b>          | 2.585 to 3.168   | 6.953 to 13.05     | 5.411 to 13.11    | 2.667 to 3.320   | 2.158 to 2.476   |
| <b>Goodness of Fit</b>            |                           |                  |                    |                   |                  |                  |
|                                   | <b>Degrees of Freedom</b> | 22               | 22                 | 22                | 22               | 22               |
|                                   | <b>R square</b>           | 0.9916           | 0.9916             | 0.98              | 0.9909           | 0.9942           |
|                                   | <b>Adjusted R square</b>  | 0.9912           | 0.9913             | 0.9791            | 0.9905           | 0.9939           |

**Table S4.** Results of the non-linear regression of the idxSWL (%) time series for sample P4 and all pH factor levels.

| idxSWL(%) P4                      | pH 1.2            | pH 3              | pH 5             | pH 6.8            | pH 7.4           |
|-----------------------------------|-------------------|-------------------|------------------|-------------------|------------------|
| One phase exponential association |                   |                   |                  |                   |                  |
| Best-fit values                   |                   |                   |                  |                   |                  |
| Ymax                              | 2509              | 4998              | -313.3           | 15782             | 15465            |
| K                                 | 0.08762           | 0.0648            | 683              | 0.1345            | 0.2438           |
| Half Life                         | 7.911             | 10.7              |                  | 5.153             | 2.843            |
| Std. Error                        |                   |                   |                  |                   |                  |
| Ymax                              | 483.3             | 1129              | 83.66            | 1395              | 239.4            |
| K                                 | 0.0222            | 0.01795           | 16.57            | 0.01801           | 0.007703         |
| 95% Confidence Intervals          |                   |                   |                  |                   |                  |
| Ymax                              | 1507 to 3512      | 2657 to 7339      | -486.8 to -139.8 | 12889 to 18674    | 14968 to 15961   |
| K                                 | 0.04156 to 0.1337 | 0.02758 to 0.1020 | 648.7 to 717.4   | 0.09716 to 0.1718 | 0.2278 to 0.2597 |
| Half Life                         | 5.186 to 16.68    | 6.794 to 25.14    |                  | 4.033 to 7.134    | 2.669 to 3.043   |
| Goodness of Fit                   |                   |                   |                  |                   |                  |
| Degrees of Freedom                | 22                | 22                | 22               | 22                | 22               |
| R square                          | 0.9703            | 0.9799            | 0.9872           | 0.9801            | 0.9963           |
| Adjusted R square                 | 0.969             | 0.979             | 0.9866           | 0.9792            | 0.9962           |

**Table S5.** Results of the non-linear regression of the idxSWL (%) time series for sample P5 and all pH factor levels.

| idxSWL(%) P5    | pH 1.2      | pH 3   | pH 5   | pH 6.8 | pH 7.4 |       |
|-----------------|-------------|--------|--------|--------|--------|-------|
| Line            |             |        |        |        |        |       |
| Best-fit values | Y Intercept | -6.416 | -38.02 | -448   | 421.3  | 1898  |
|                 | Slope       | 140.1  | 225.6  | 599    | 1104   | 1263  |
| Std. Error      | Y Intercept | 20.34  | 26.24  | 104    | 133.1  | 176.6 |
|                 | Slope       | 4.029  | 5.195  | 20.59  | 26.35  | 34.97 |

|                                 |                 |                 |                  |                |              |
|---------------------------------|-----------------|-----------------|------------------|----------------|--------------|
| <b>95% Confidence Intervals</b> |                 |                 |                  |                |              |
| <b>Y Intercept</b>              | -48.61 to 35.78 | -92.43 to 16.39 | -663.7 to -232.4 | 145.4 to 697.3 | 1532 to 2264 |
| <b>Slope</b>                    | 131.7 to 148.4  | 214.8 to 236.4  | 556.3 to 641.7   | 1049 to 1158   | 1191 to 1336 |
| <b>Goodness of Fit</b>          |                 |                 |                  |                |              |
| <b>Degrees of Freedom</b>       | 22              | 22              | 22               | 22             | 22           |
| <b>R square</b>                 | 0.9821          | 0.9885          | 0.9747           | 0.9876         | 0.9834       |
| <b>Adjusted R square</b>        | 0.9813          | 0.9879          | 0.9735           | 0.9871         | 0.9827       |

**Table S6.** Results of the non-linear regression of the idxSWL (%) time series for sample P6 and all pH factor levels.

| idxSWL (%) P6                   | pH 1.2          | pH 3             | pH 5             | pH 6.8          | pH 7.4        |
|---------------------------------|-----------------|------------------|------------------|-----------------|---------------|
| <b>Line</b>                     |                 |                  |                  |                 |               |
| <b>Best-fit values</b>          |                 |                  |                  |                 |               |
| <b>Y Intercept</b>              | -22.87          | -81.46           | -415.7           | -19.66          | 1009          |
| <b>Slope</b>                    | 124.6           | 210.1            | 520.5            | 1068            | 1265          |
| <b>Std. Error</b>               |                 |                  |                  |                 |               |
| <b>Y Intercept</b>              | 19.62           | 25.09            | 67.78            | 146.6           | 95.98         |
| <b>Slope</b>                    | 3.886           | 4.969            | 13.42            | 29.04           | 19.01         |
| <b>95% Confidence Intervals</b> |                 |                  |                  |                 |               |
| <b>Y Intercept</b>              | -63.57 to 17.82 | -133.5 to -29.42 | -556.3 to -275.1 | -323.8 to 284.5 | 810.3 to 1208 |
| <b>Slope</b>                    | 116.5 to 132.6  | 199.8 to 220.4   | 492.6 to 548.3   | 1008 to 1128    | 1225 to 1304  |
| <b>Goodness of Fit</b>          |                 |                  |                  |                 |               |
| <b>Degrees of Freedom</b>       | 22              | 22               | 22               | 22              | 22            |
| <b>R square</b>                 | 0.979           | 0.9878           | 0.9856           | 0.984           | 0.9951        |
| <b>Adjusted R square</b>        | 0.9781          | 0.9873           | 0.9849           | 0.9833          | 0.9948        |

**Table S7.** Results of the non-linear regression of the idxSWL (%) time series for sample E1 and all pH factor levels.

| idxSWL(%) E1                             | pH 1.2           | pH 3              | pH 5              | pH 6.8           | pH 7.4           |
|------------------------------------------|------------------|-------------------|-------------------|------------------|------------------|
| <b>One phase exponential association</b> |                  |                   |                   |                  |                  |
| <b>Best-fit values</b>                   |                  |                   |                   |                  |                  |
| <b>Ymax</b>                              | 1528             | 5637              | 13078             | 12273            | 14830            |
| <b>K</b>                                 | 0.2533           | 0.08071           | 0.09212           | 0.2355           | 0.3015           |
| <b>Half Life</b>                         | 2.736            | 8.588             | 7.524             | 2.944            | 2.299            |
| <b>Std. Error</b>                        |                  |                   |                   |                  |                  |
| <b>Ymax</b>                              | 31.68            | 586.1             | 1908              | 318.9            | 208.6            |
| <b>K</b>                                 | 0.01098          | 0.01081           | 0.01793           | 0.01223          | 0.009929         |
| <b>95% Confidence Intervals</b>          |                  |                   |                   |                  |                  |
| <b>Ymax</b>                              | 1462 to 1594     | 4421 to 6853      | 9120 to 17036     | 11612 to 12934   | 14398 to 15263   |
| <b>K</b>                                 | 0.2305 to 0.2761 | 0.05829 to 0.1031 | 0.05493 to 0.1293 | 0.2101 to 0.2608 | 0.2809 to 0.3221 |
| <b>Half Life</b>                         | 2.511 to 3.007   | 6.720 to 11.89    | 5.360 to 12.62    | 2.657 to 3.299   | 2.152 to 2.468   |
| <b>Goodness of Fit</b>                   |                  |                   |                   |                  |                  |
| <b>Degrees of Freedom</b>                | 22               | 22                | 22                | 22               | 22               |
| <b>R square</b>                          | 0.9928           | 0.9922            | 0.9804            | 0.9911           | 0.9942           |

|                          |        |        |        |        |       |
|--------------------------|--------|--------|--------|--------|-------|
| <b>Adjusted R square</b> | 0.9925 | 0.9918 | 0.9795 | 0.9907 | 0.994 |
|--------------------------|--------|--------|--------|--------|-------|

**Table S8.** Results of the non-linear regression of the idxSWL (%) time series for sample E2 and all pH factor levels.

| <b>idxSWL(%) E2</b>             | <b>pH 1.2</b>  | <b>pH 3</b>     | <b>pH 5</b>     | <b>pH 6.8</b> | <b>pH 7.4</b> |
|---------------------------------|----------------|-----------------|-----------------|---------------|---------------|
| <b>Line</b>                     |                |                 |                 |               |               |
| <b>Best-fit values</b>          |                |                 |                 |               |               |
| <b>Y Intercept</b>              | 128.5          | -5.451          | -217.6          | 1045          | 2729          |
| <b>Slope</b>                    | 155.3          | 309.8           | 789             | 1250          | 1464          |
| <b>Std. Error</b>               |                |                 |                 |               |               |
| <b>Y Intercept</b>              | 38.87          | 39.15           | 137.1           | 264.7         | 379.5         |
| <b>Slope</b>                    | 7.698          | 7.754           | 27.14           | 52.43         | 75.15         |
| <b>95% Confidence Intervals</b> |                |                 |                 |               |               |
| <b>Y Intercept</b>              | 47.86 to 209.1 | -86.66 to 75.76 | -501.9 to 66.71 | 496.2 to 1594 | 1942 to 3516  |
| <b>Slope</b>                    | 139.3 to 171.3 | 293.7 to 325.8  | 732.7 to 845.3  | 1141 to 1359  | 1308 to 1620  |
| <b>Goodness of Fit</b>          |                |                 |                 |               |               |
| <b>Degrees of Freedom</b>       | 22             | 22              | 22              | 22            | 22            |
| <b>R square</b>                 | 0.9487         | 0.9864          | 0.9746          | 0.9628        | 0.9452        |
| <b>Adjusted R square</b>        | 0.9464         | 0.9858          | 0.9735          | 0.9611        | 0.9427        |

**Table S9.** Results of the non-linear regression of the idxSWL (%) time series for sample E3 and all pH factor levels.

| <b>idxSWL(%) E3</b>             | <b>pH 1.2</b>   | <b>pH 3</b>     | <b>pH 5</b>      | <b>pH 6.8</b>   | <b>pH 7.4</b> |
|---------------------------------|-----------------|-----------------|------------------|-----------------|---------------|
| <b>Line</b>                     |                 |                 |                  |                 |               |
| <b>Best-fit values</b>          |                 |                 |                  |                 |               |
| <b>Y Intercept</b>              | 34.4            | -37.21          | -587.8           | 92.34           | 1742          |
| <b>Slope</b>                    | 147.3           | 249.8           | 682.5            | 1313            | 1424          |
| <b>Std. Error</b>               |                 |                 |                  |                 |               |
| <b>Y Intercept</b>              | 31.41           | 30.26           | 113.7            | 203.3           | 289.7         |
| <b>Slope</b>                    | 6.22            | 5.993           | 22.51            | 40.27           | 57.37         |
| <b>95% Confidence Intervals</b> |                 |                 |                  |                 |               |
| <b>Y Intercept</b>              | -30.74 to 99.54 | -99.97 to 25.55 | -823.6 to -352.1 | -329.4 to 514.1 | 1141 to 2343  |
| <b>Slope</b>                    | 134.4 to 160.2  | 237.4 to 262.2  | 635.8 to 729.1   | 1229 to 1396    | 1305 to 1543  |
| <b>Goodness of Fit</b>          |                 |                 |                  |                 |               |
| <b>Degrees of Freedom</b>       | 22              | 22              | 22               | 22              | 22            |
| <b>R square</b>                 | 0.9622          | 0.9875          | 0.9766           | 0.9797          | 0.9655        |
| <b>Adjusted R square</b>        | 0.9605          | 0.9869          | 0.9756           | 0.9788          | 0.964         |

**Table S10.** Results of the non-linear regression of the idxSWL (%) time series for sample E4 and all pH factor levels.

| <b>idxSWL (%) E4</b>            | <b>pH 1.2</b> | <b>pH 3</b> | <b>pH 5</b> | <b>pH 6.8</b> | <b>pH 7.4</b> |
|---------------------------------|---------------|-------------|-------------|---------------|---------------|
| <b>Line</b>                     |               |             |             |               |               |
| <b>Best-fit values</b>          |               |             |             |               |               |
| <b>Y Intercept</b>              | -14.83        | -49.46      | -377.4      | 331.4         | 1433          |
| <b>Slope</b>                    | 131.5         | 214.3       | 543.1       | 1062          | 1263          |
| <b>Std. Error</b>               |               |             |             |               |               |
| <b>Y Intercept</b>              | 16.41         | 22.98       | 78.3        | 150.9         | 152.9         |
| <b>Slope</b>                    | 3.25          | 4.55        | 15.51       | 29.89         | 30.27         |
| <b>95% Confidence Intervals</b> |               |             |             |               |               |

|                           |                 |                  |                  |                |              |
|---------------------------|-----------------|------------------|------------------|----------------|--------------|
| <b>Y Intercept</b>        | -48.86 to 19.21 | -97.12 to -1.800 | -539.8 to -215.0 | 18.38 to 644.4 | 1116 to 1750 |
| <b>Slope</b>              | 124.8 to 138.2  | 204.9 to 223.7   | 511.0 to 575.3   | 999.5 to 1124  | 1200 to 1326 |
| <b>Goodness of Fit</b>    |                 |                  |                  |                |              |
| <b>Degrees of Freedom</b> | 22              | 22               | 22               | 22             | 22           |
| <b>R square</b>           | 0.9867          | 0.9902           | 0.9824           | 0.9829         | 0.9875       |
| <b>Adjusted R square</b>  | 0.9861          | 0.9897           | 0.9816           | 0.9821         | 0.987        |

**Table S11. Results of the idxSWL(%) for P1-P6 samples in all pH levels.**

| pH         | P1                    | P2                    | P3                    | P4                    | P5                    | P6                    |
|------------|-----------------------|-----------------------|-----------------------|-----------------------|-----------------------|-----------------------|
| <b>1.2</b> | 914.807l-n<br>±0.572  | 924.672l-n<br>±0.542  | 935.683l-n<br>±0.569  | 772.215l-n<br>±1.309  | 623.972mn<br>±1.131   | 537.767n<br>±1.188    |
| <b>3</b>   | 1603.543j-n<br>±0.215 | 1614.367j-n<br>±0.263 | 1627.044j-n<br>±0.243 | 1207.633k-n<br>±2.279 | 977.138l-n<br>±1.984  | 864.176l-n<br>±2.084  |
| <b>5</b>   | 4149.649gh<br>±0.411  | 4160.473gh<br>±0.452  | 4173.150gh<br>±0.328  | 2760.377ij<br>±1.265  | 2247.395i-l<br>±1.117 | 1926.485j-n<br>±1.169 |
| <b>6.8</b> | 7296.741c-e<br>±0.334 | 7307.565c-e<br>±2.361 | 7320.242c-e<br>±0.563 | 6684.781de<br>±0.319  | 5387.675fg<br>±0.254  | 4787.327fg<br>±0.309  |
| <b>7.4</b> | 9973.059a<br>±0.663   | 9983.945a<br>±0.215   | 9996.623a<br>±0.123   | 9431.456a<br>±0.109   | 7582.578cd<br>±0.086  | 6701.290de<br>±0.105  |

**Table S12. Results of the idxSWL(%) in all pH levels, expressed in terms of time and pH**

| time      | pH_1.2              | pH_3                | pH_5                  | pH_6.8               | pH_7.4                 |
|-----------|---------------------|---------------------|-----------------------|----------------------|------------------------|
| <b>1h</b> | 191.330w ±72.395    | 266.159vw ±76.258   | 485.013s-w ±94.912    | 1665.135r-v ±361.239 | 2972.709r-u ±493.620   |
| <b>2h</b> | 377.537q-t ±165.874 | 530.255q-s ±209.755 | 1229.763p-r ±566.038  | 3222.050vw ±1066.292 | 5392.412t-w ±1237.801  |
| <b>3h</b> | 621.008r-u ±165.401 | 910.790p-r ±214.103 | 2166.603o-q ±804.237  | 5053.342no ±1110.367 | 7478.961-o ±1422.319   |
| <b>4h</b> | 770.892n ±202.831   | 1190.589u ±323.424  | 2948.168p-r ±1176.542 | 6397.322n ±1300.358  | 8900.014m ±1763.748    |
| <b>5h</b> | 934.695l ±180.775   | 1530.209k ±368.001  | 3645.050j ±1283.234   | 7488.399j ±1350.590  | 10147.745n-p ±1779.058 |
| <b>6h</b> | 1025.960lm ±145.861 | 1782.036j ±377.886  | 4185.314i ±1265.283   | 8464.181h ±891.390   | 11027.129g ±1282.563   |
| <b>7h</b> | 1120.543ef ±155.245 | 1990.247e ±470.941  | 5028.672m ±1177.650   | 9270.492j ±1013.613  | 12046.675h ±1297.194   |
| <b>8h</b> | 1165.420fg ±131.811 | 2138.877d ±396.213  | 5500.254c ±978.611    | 9555.741b ±716.877   | 12643.360a ±904.720    |

**Table S13. Results of idxSWL(%) of CAQ-Ms in all pH levels.**

| pH         | idxSWL (%)       |
|------------|------------------|
| <b>1.2</b> | 775.923e ±0.367  |
| <b>3</b>   | 1292.395d ±1.037 |
| <b>5</b>   | 3148.605c ±0.426 |
| <b>6.8</b> | 6389.583b ±1.274 |
| <b>7.4</b> | 8826.126a ±0.267 |

**Table S14. Results of idxSLW(%) of CAQ-Ms with/without quercetin**

| Sample    | idxSWL (%)  |
|-----------|-------------|
| <b>P1</b> | 4787.5±0.63 |
| <b>P2</b> | 4798.2±0.12 |
| <b>P3</b> | 4810.5±0.03 |
| <b>P4</b> | 4171.3±0.42 |
| <b>P5</b> | 3363.7±0.36 |
| <b>P6</b> | 2963.4±0.43 |
| <b>E1</b> | 4823.3±0.17 |

|    |             |
|----|-------------|
| E2 | 4307.1±0.71 |
| E3 | 3683.2±0.19 |
| E4 | 3156.8±0.69 |

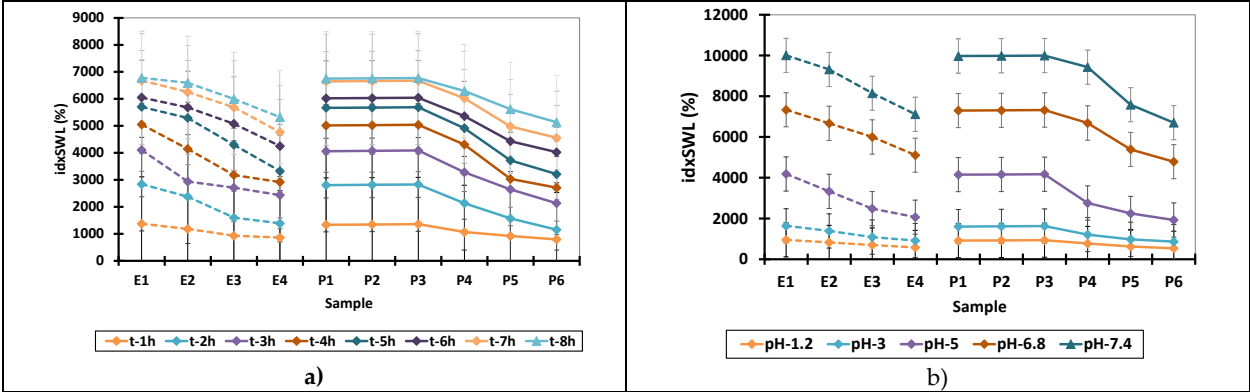

Figure S1. Analysis of swelling capacity of Ms as a function of: a) Time\*Sample and b) pH\*Sample.

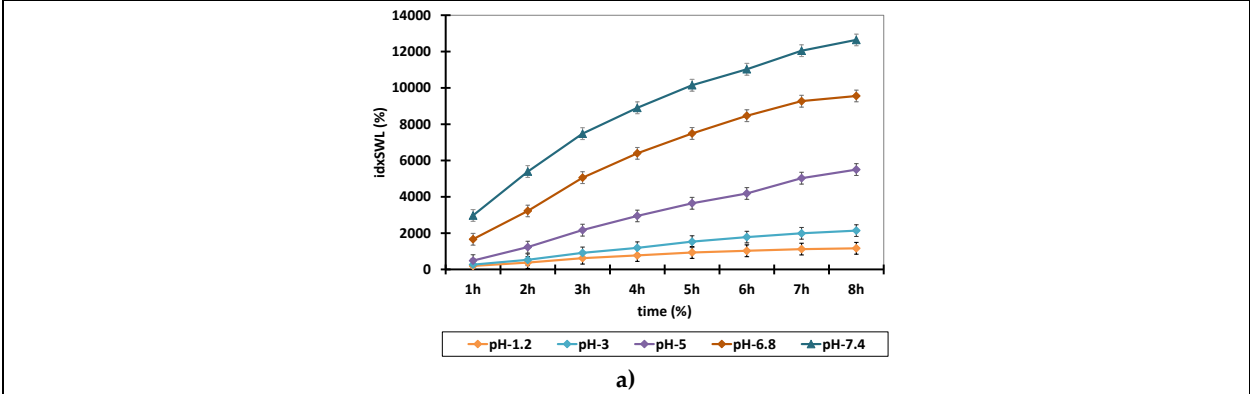

Figure S2. idxSWL of Ms expressed as a function of pH.
